# Supplementary material for: Diversity and habitat association of medium to large sized mammals in Kafta-Sheraro Biosphere, northern Ethiopia
Source: Research Square preprint supplement (doi:10.21203/rs.3.rs-6623556/v1), 2025-06-05
Supplement: Supplementary file 1 [file 94b4133496a0da93aee91b58.docx]

**Supplementary figures** (From the field plot)

By: Esayas Embaye Kidane, ORCID: <https://orcid.org/0000-0002-9667-2236>)

This document provides supplementary information on some of the mammals found in Kafta-Sheraro National Park, as well as the threats they face.

1. Some mammals of Kafta-Sheraro National Park

| 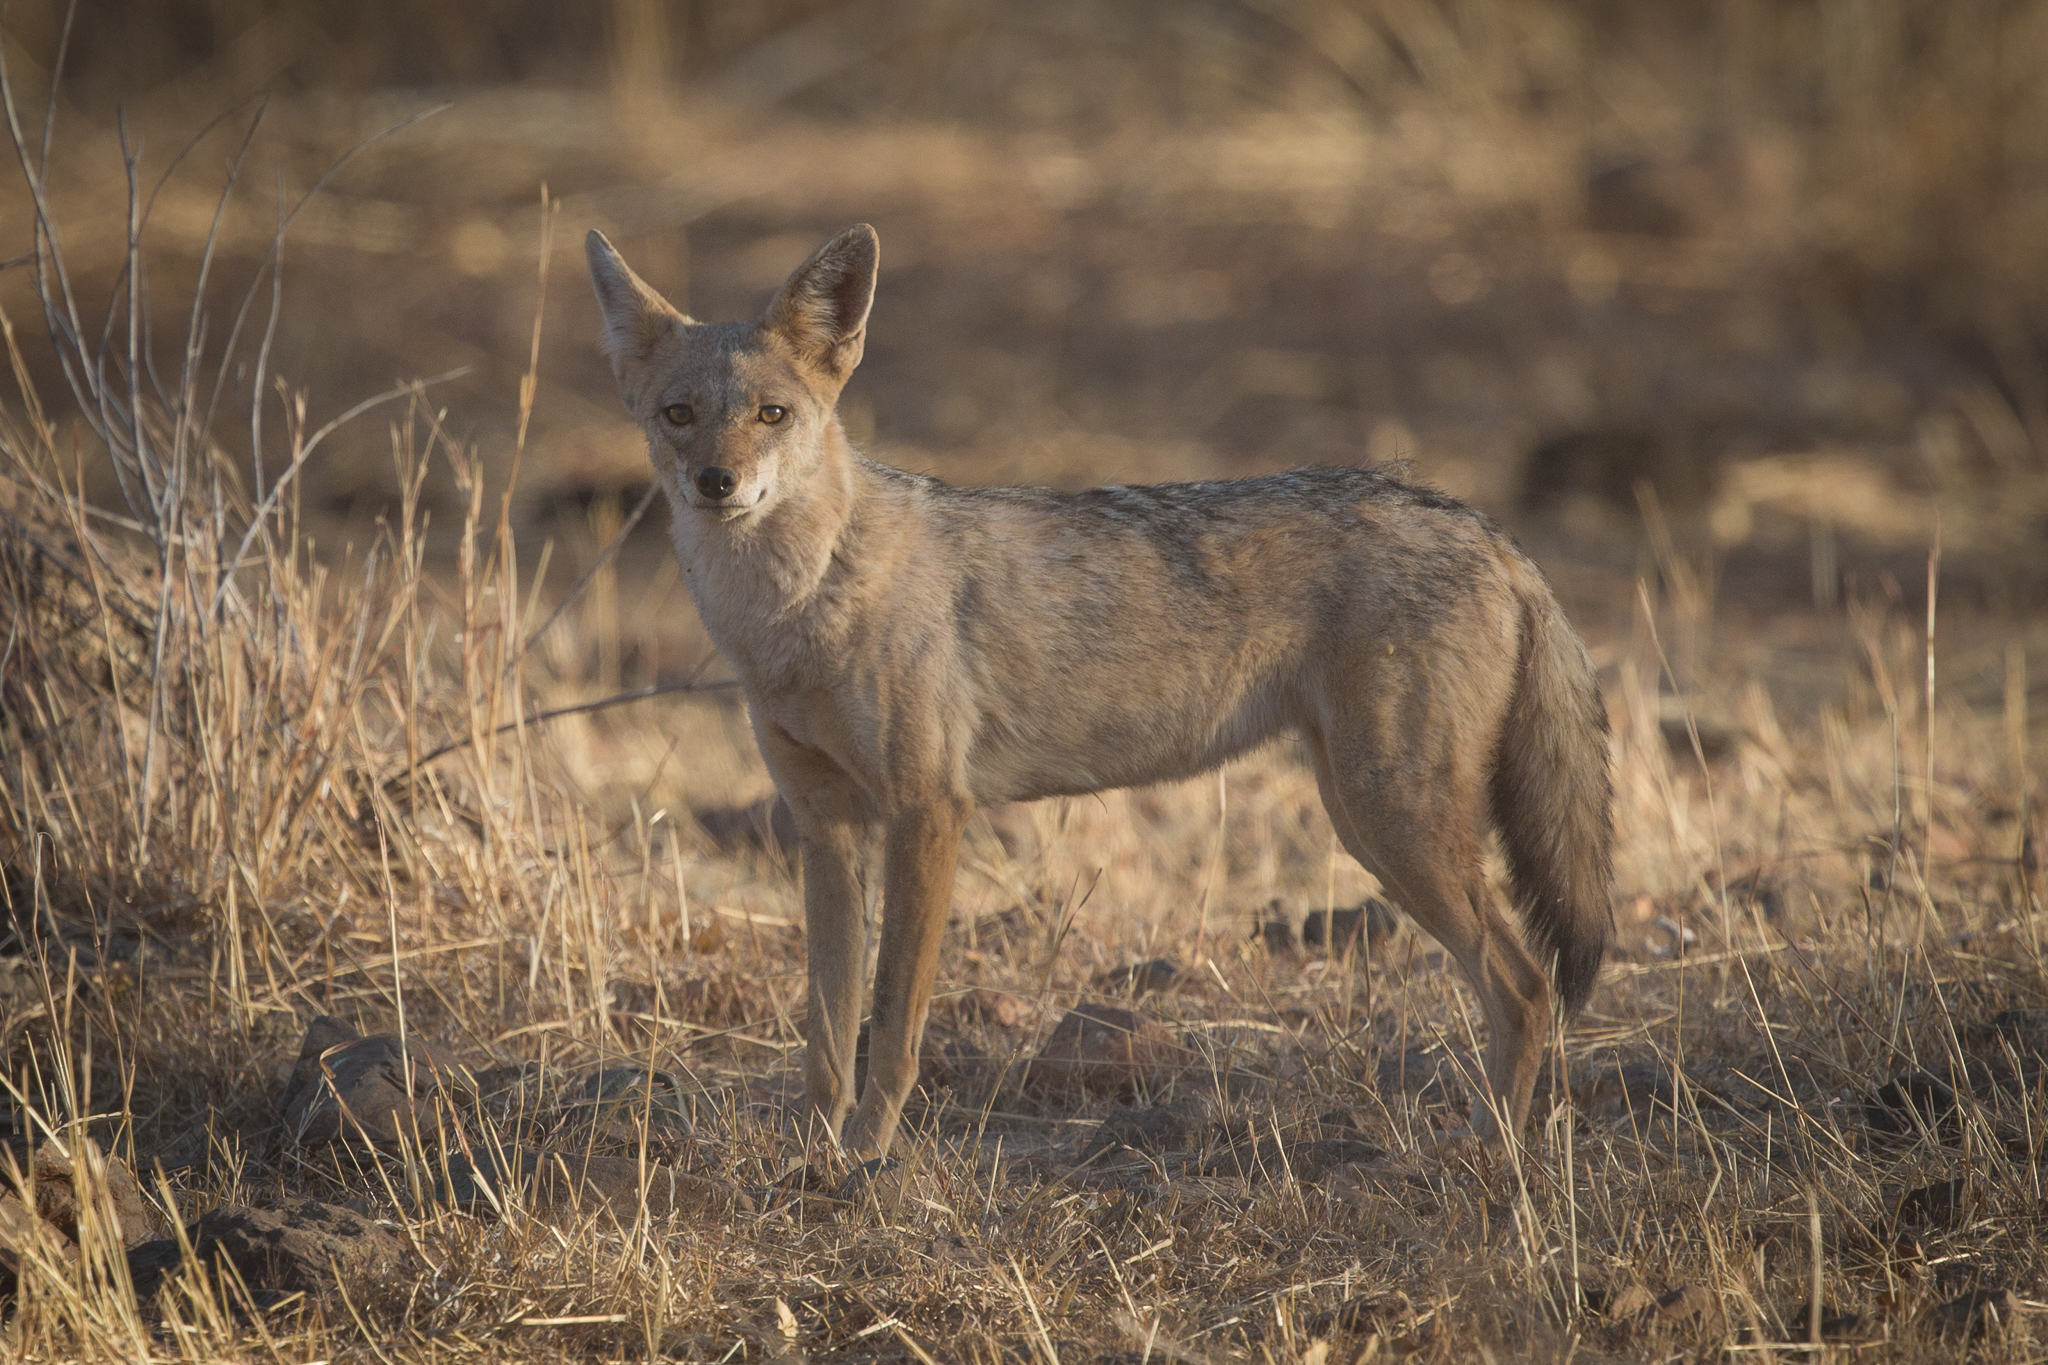  **A** | 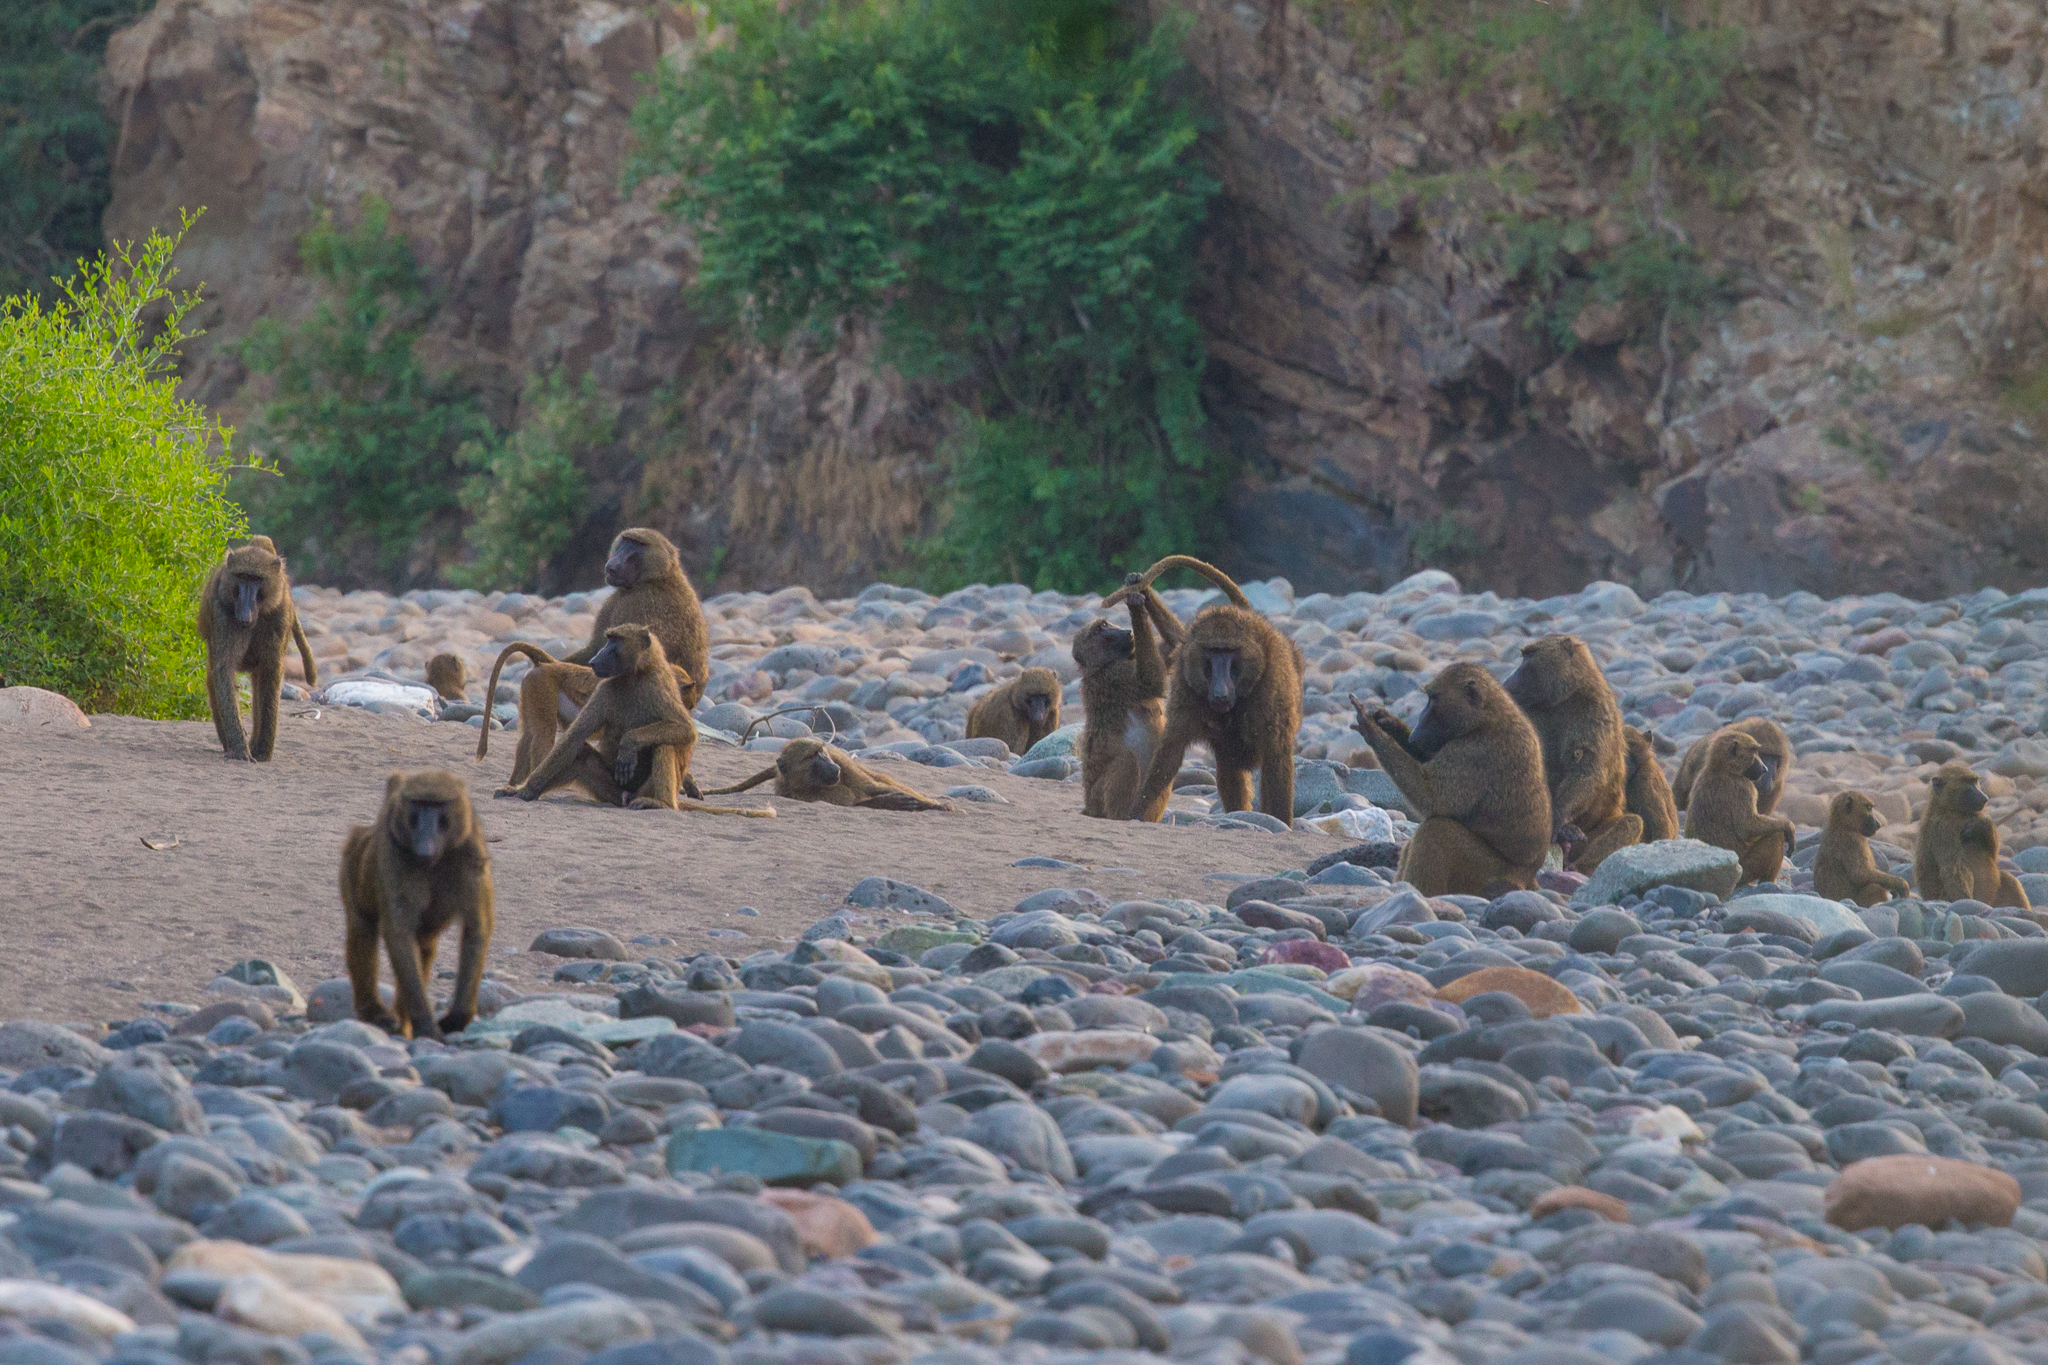  **B** |
| --- | --- |
| 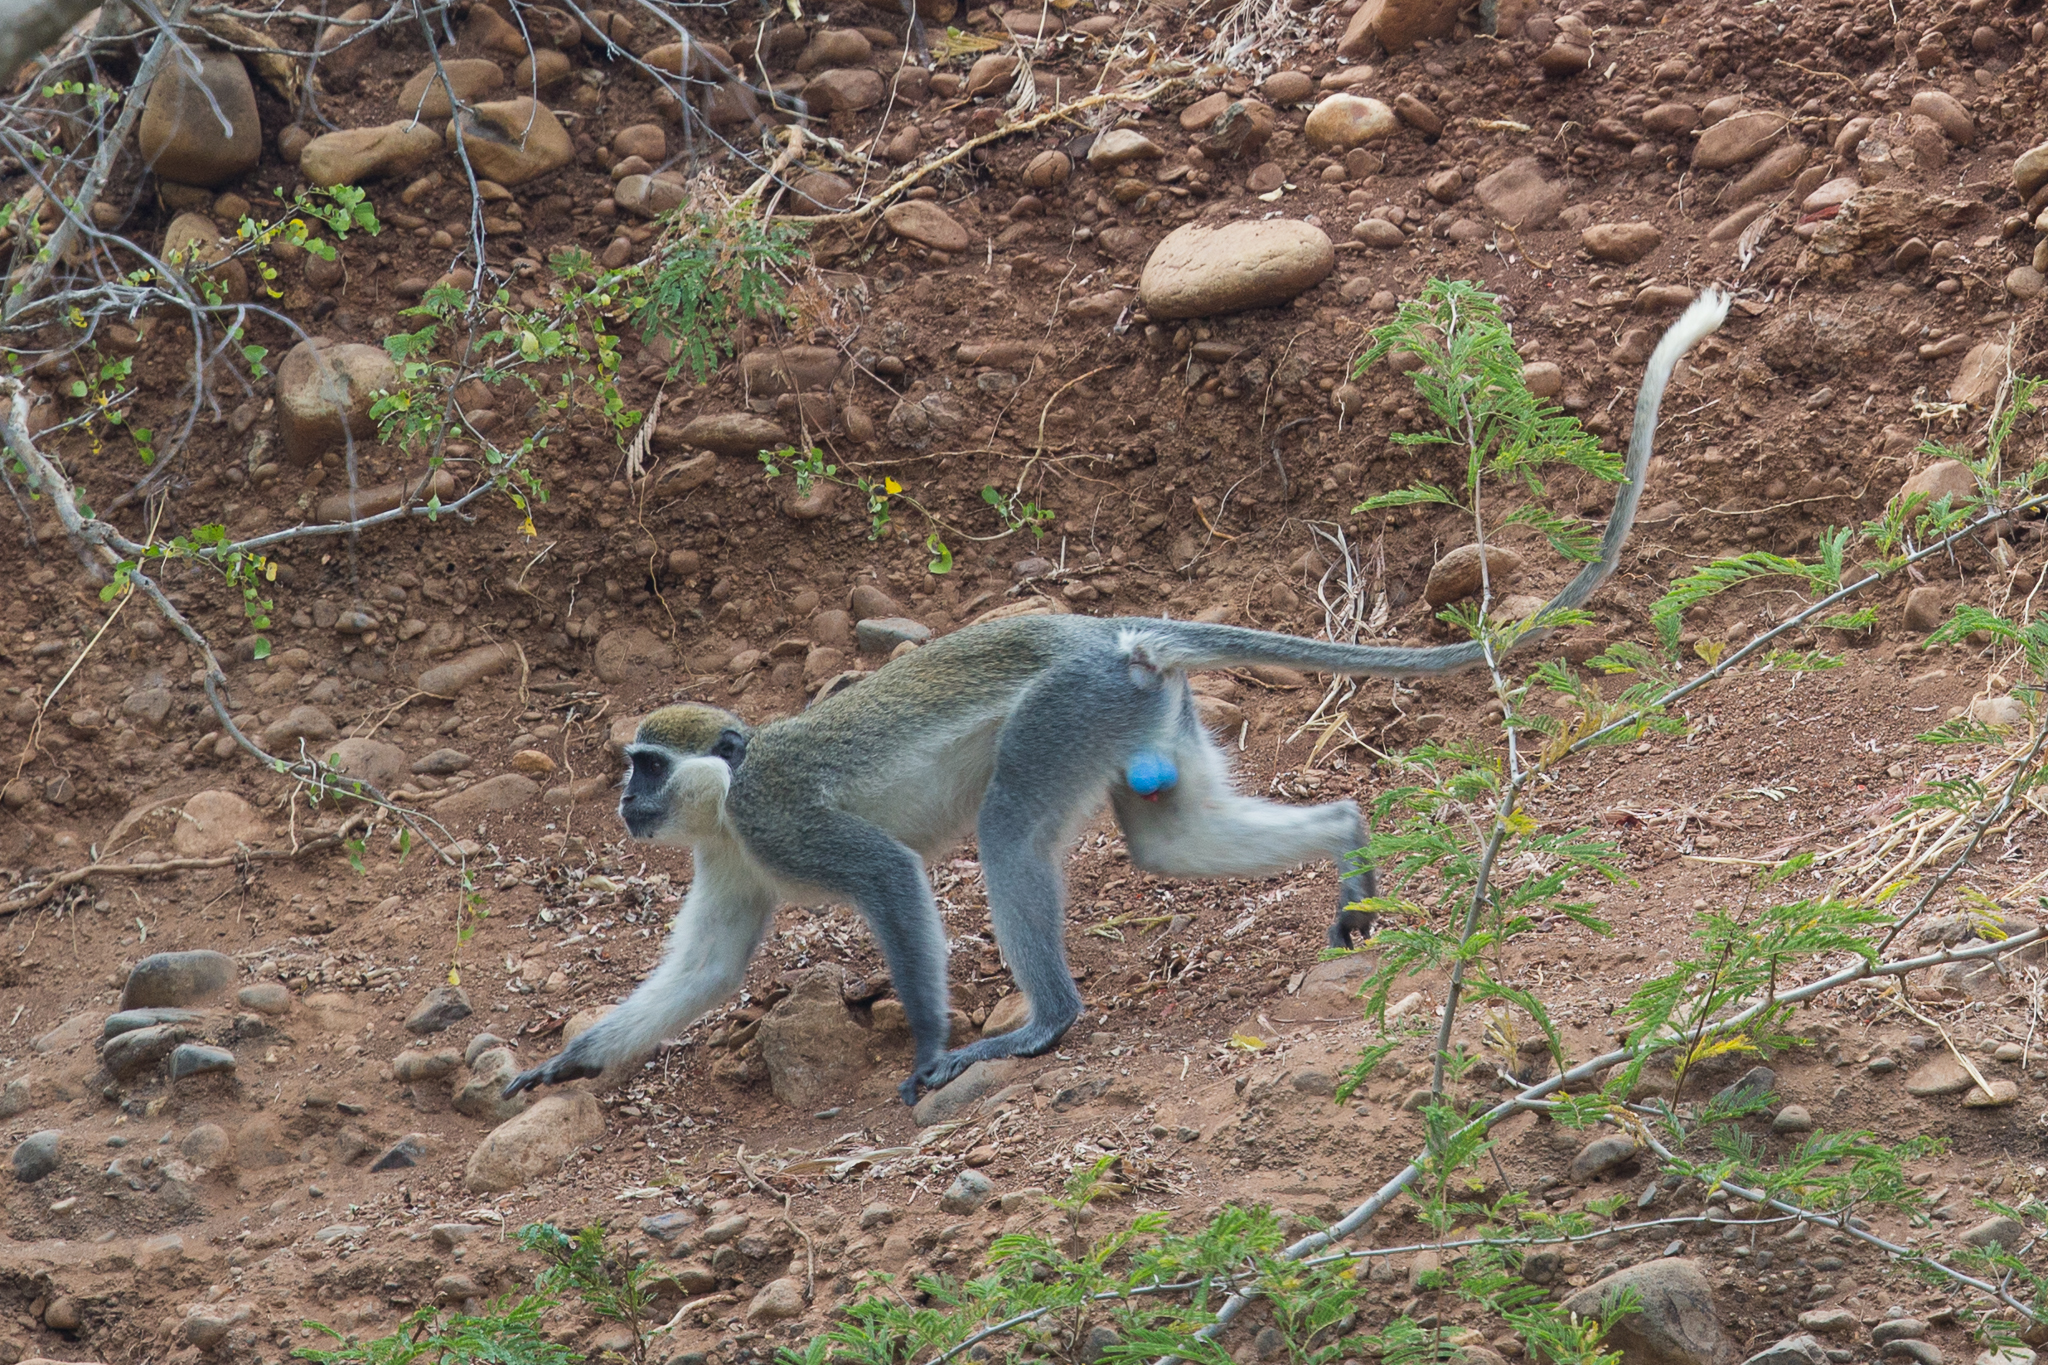  **C** | 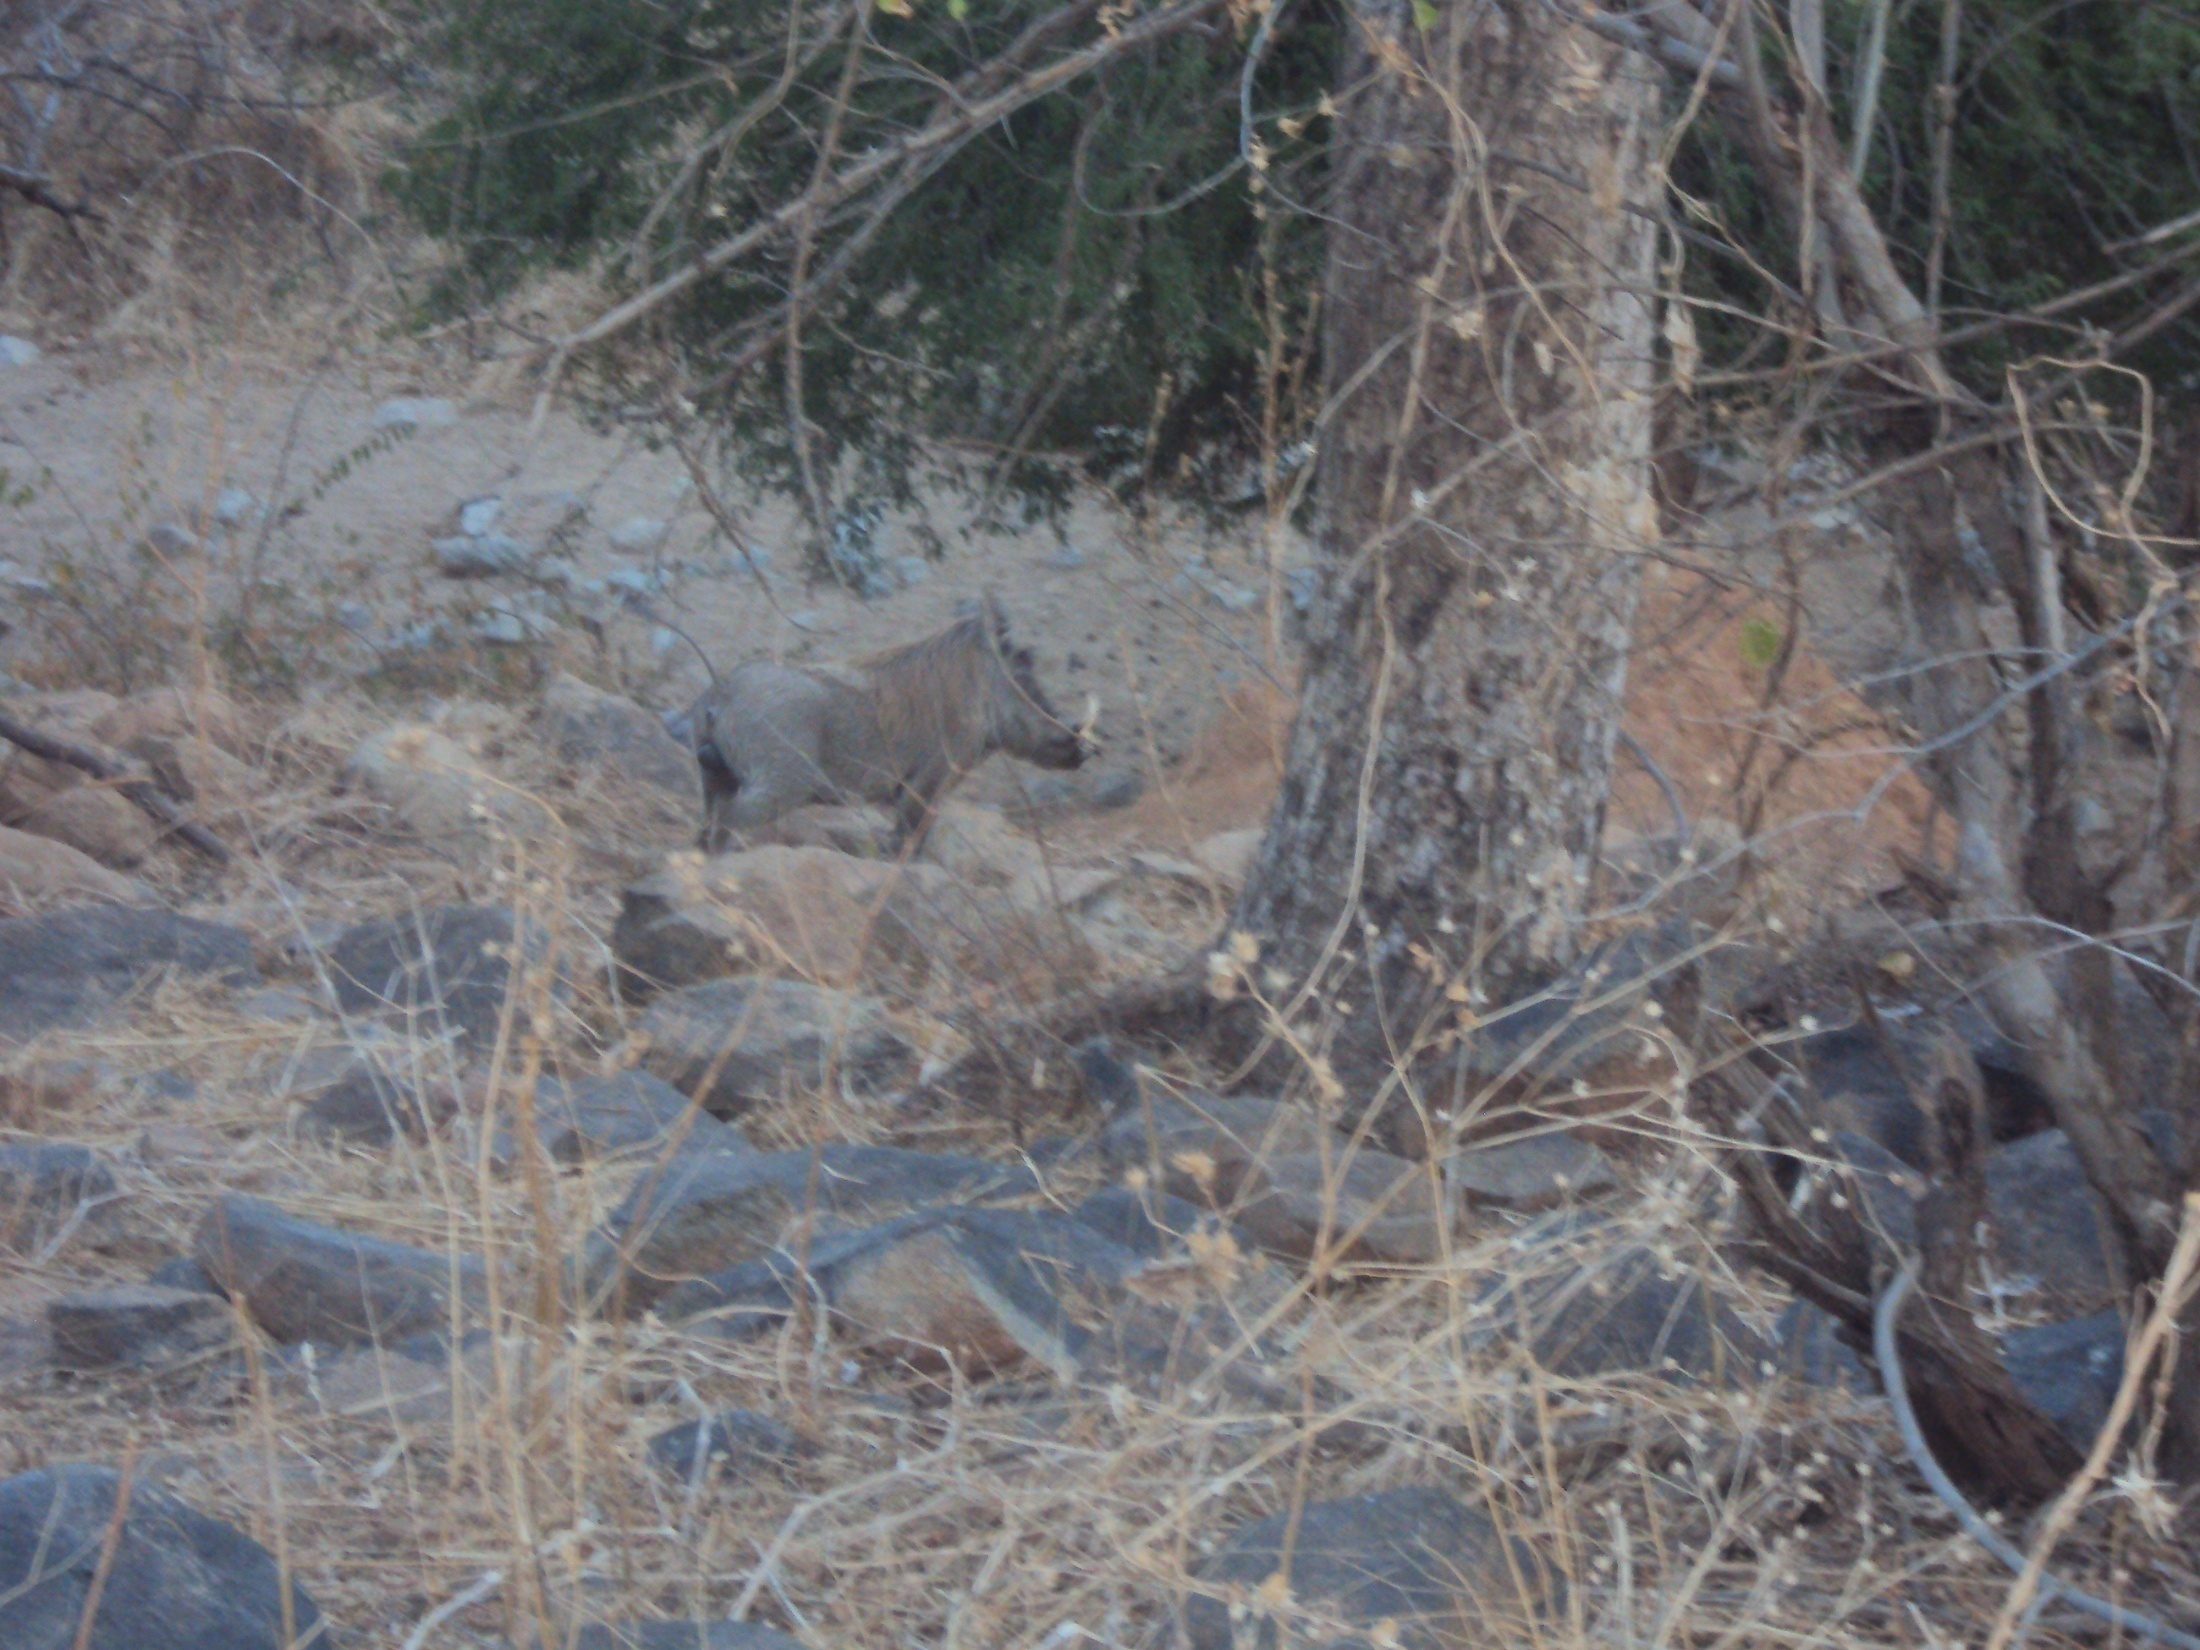  **D** |

**Plate 1**: Mammals of Kafta-Sheraro National Park; (A) *Canis mesomelas*, (B) *Papio anubis*, (C) *Chlorocebus aethiops*, and (D) *Phacochoerus africanus*

| 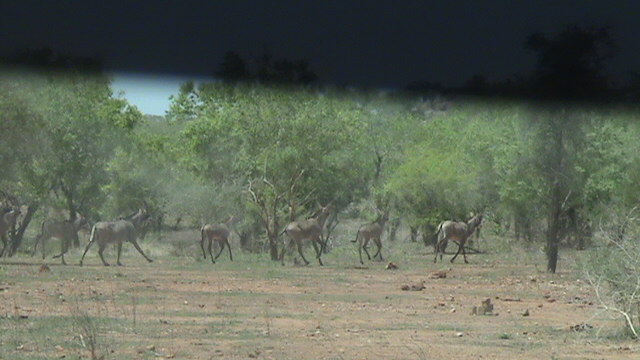  **A** | 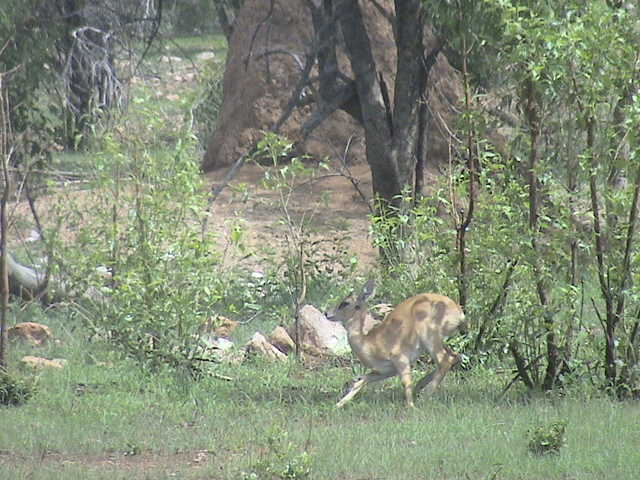  **B** |
| --- | --- |
| 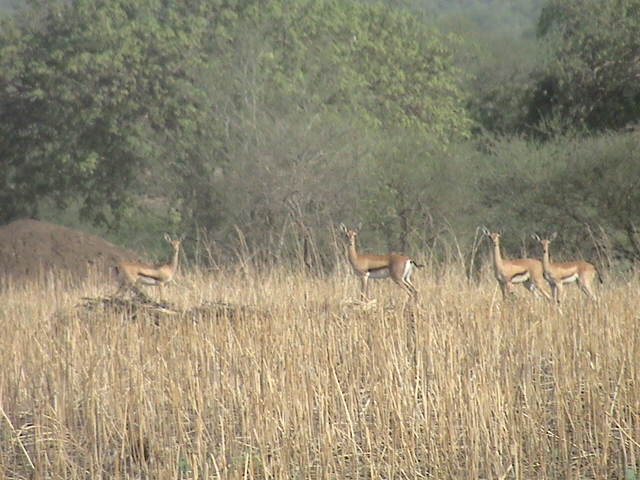  **C** | 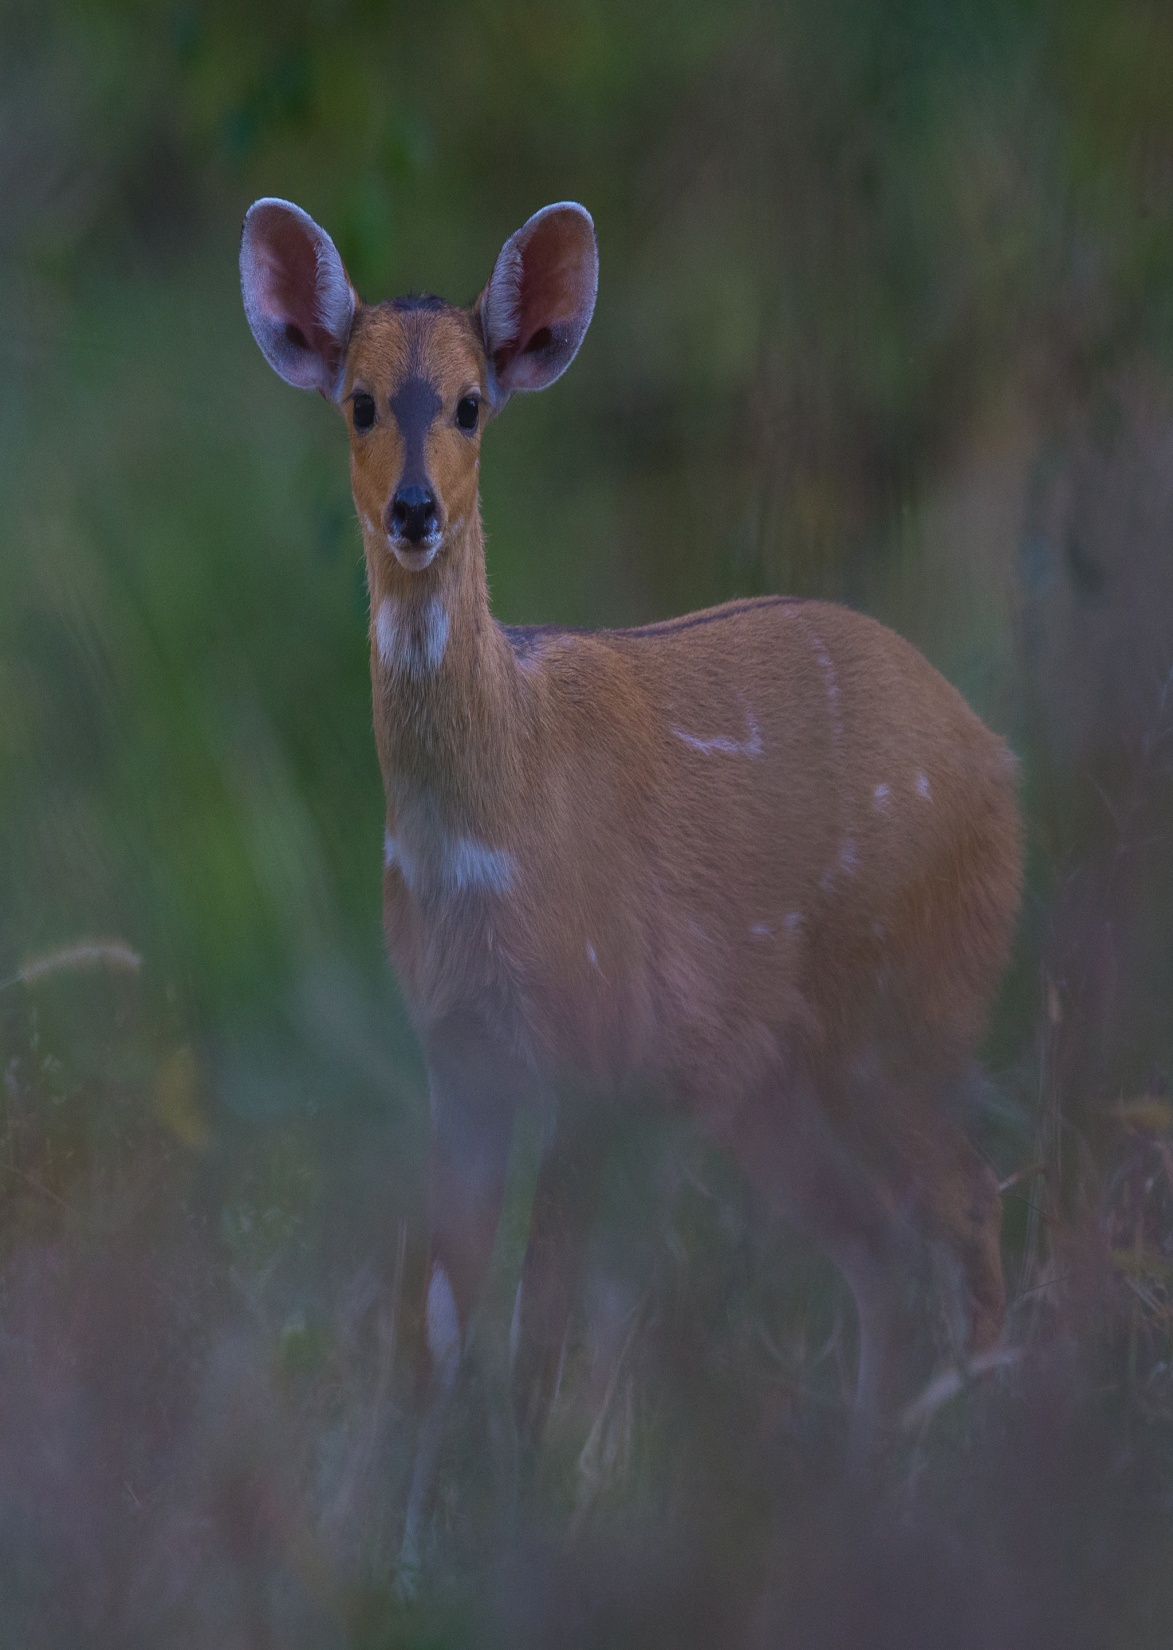  **D** |

**Plate 2**: Mammals of Kafta-Sheraro National Park; (A) *Hippotragus equinus*, (B) *Ourebia ourebi*, (C) *Eudorcas rufifrons*, and (D) *Tragelaphus skirptes*

| 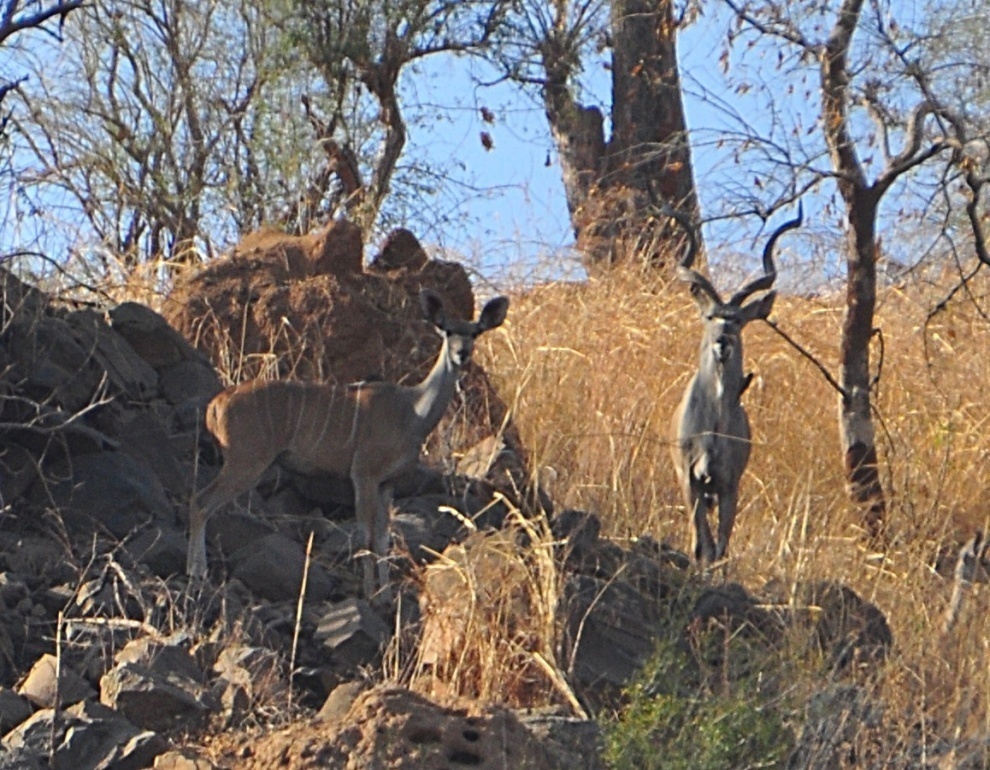  **A** | 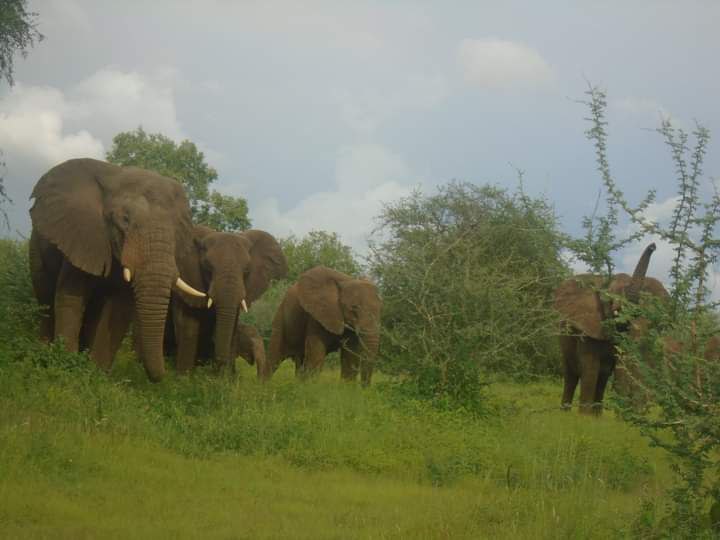  **B** |
| --- | --- |
| 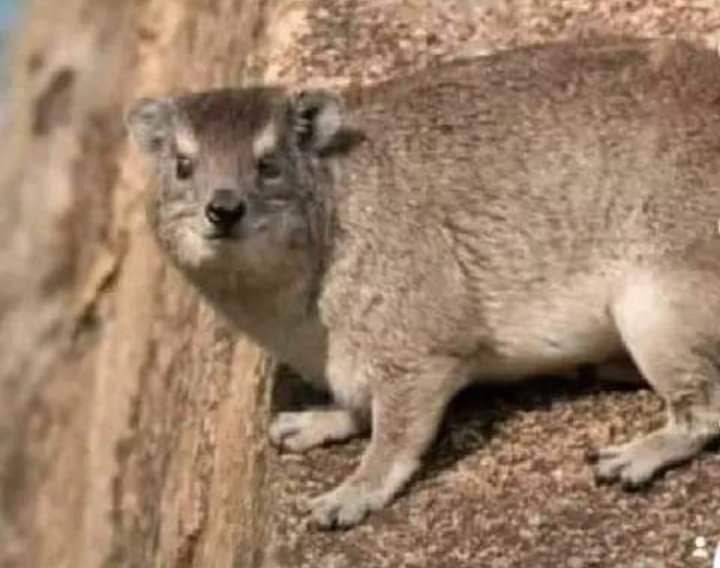  **C** | 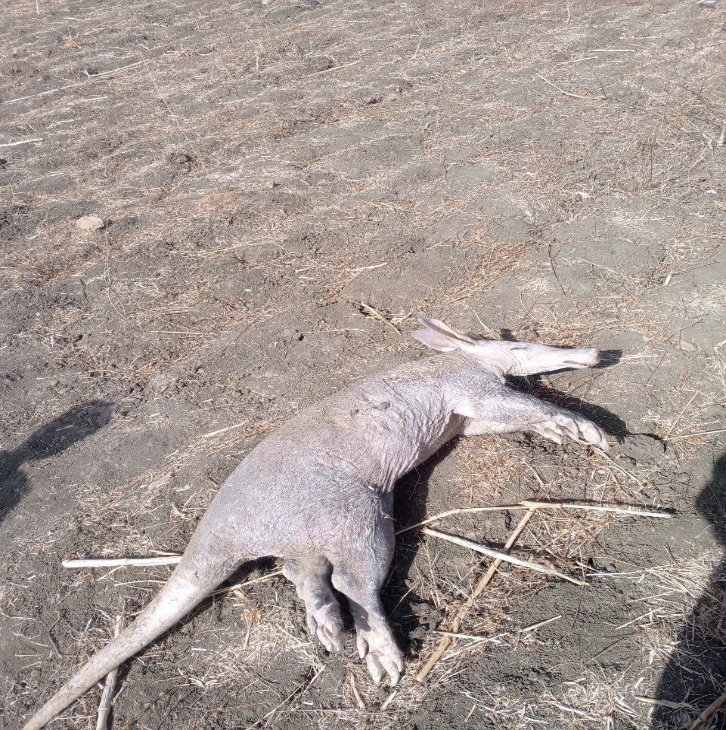  **D** |

**Plate 3**: Mammals of Kafta-Sheraro National Park; (A) *Tragelaphus strepsiceros*, (B) *Loxodonta africana*, (C) *Procavia capensis*, and (D) Dead *Orycteropus afer*

1. Threats of mammals of Kafta-Sheraro National Park

| 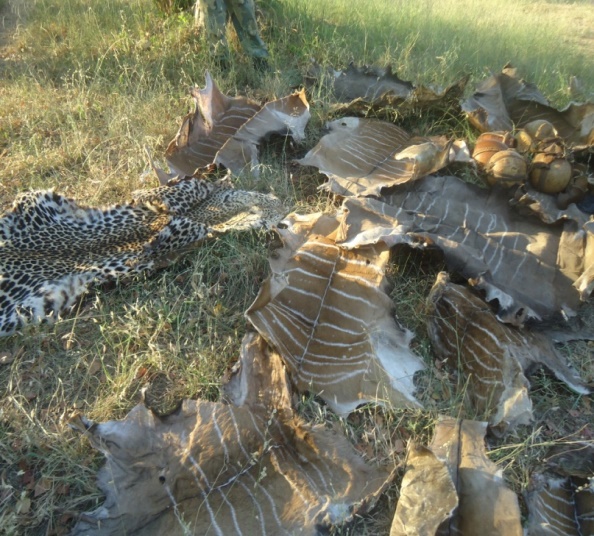  **A** | 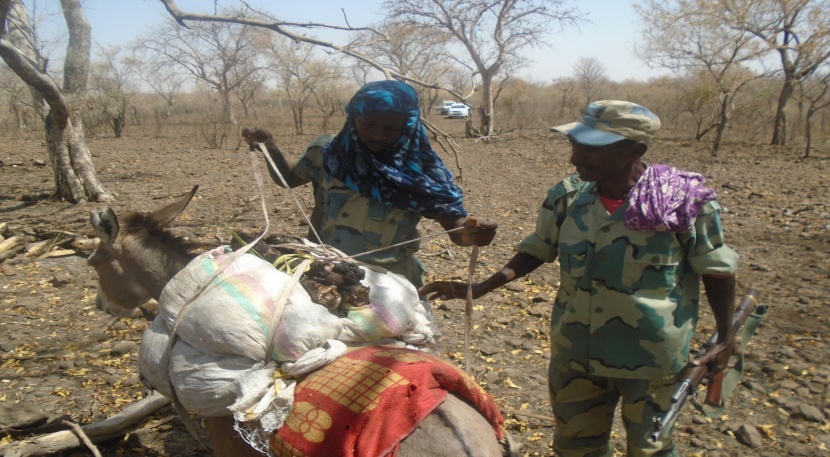  **B** |
| --- | --- |
| 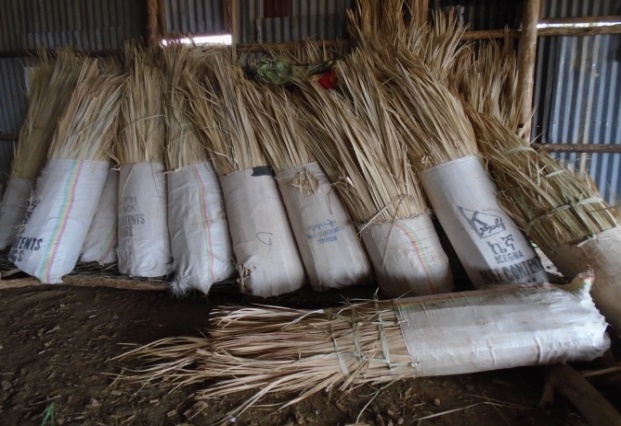  **C** | 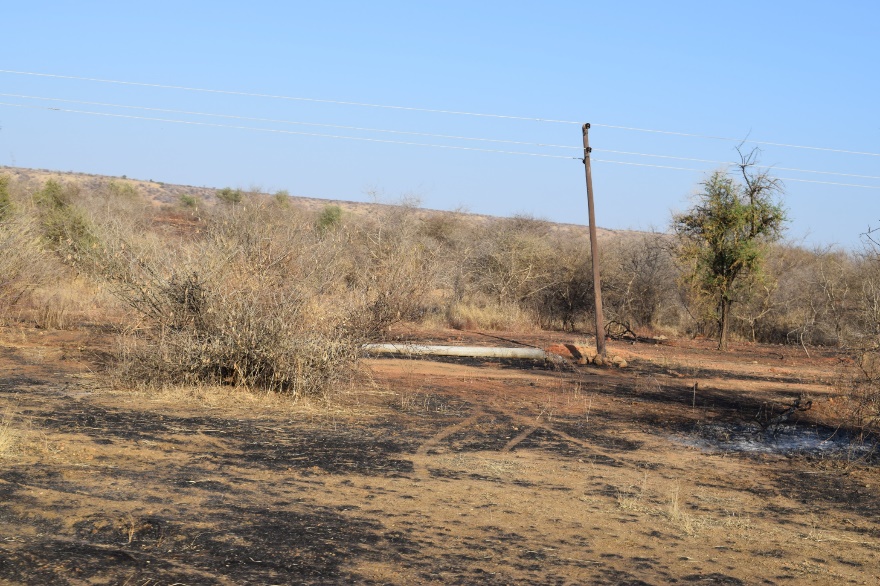  **D** |
| 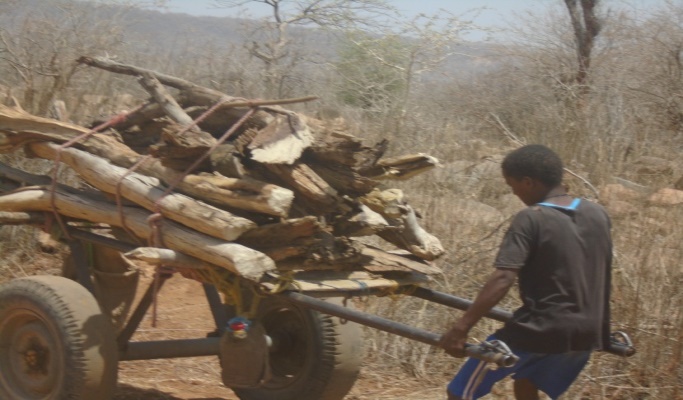  **E** | 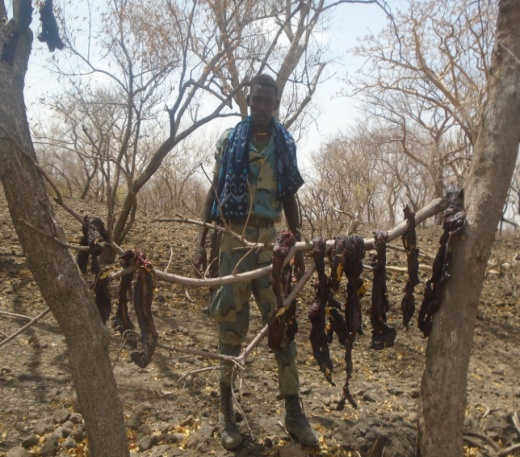  **F** |

**Plate 4**: Threats of mammals of Kafta-Sheraro National Park; (A) Hunting for different purpose, (B) Agricultural expansion, (C) Collection of economical plants, (D) bush burning, (E) Firewood collection, and (F) Meat of greater kudu (illegal hunting of mammals for meat)
